# Supplementary material for: A phase II randomized, placebo-controlled, multicenter trial to evaluate the efficacy of cytomegalovirus PepVax vaccine in preventing cytomegalovirus reactivation and disease after allogeneic hematopoietic stem cell transplant
Source: PubMed Central journal article supplement — Haematologica. 2024 Feb 8;109(6):1994–9. doi: 10.3324/haematol.2023.284544 (PMC11141674; doi:10.3324/haematol.2023.284544), 2024-02-08

# A phase II randomized, placebo-controlled, multicenter trial to evaluate the efficacy of cytomegalovirus PepVax vaccine in preventing cytomegalovirus reactivation and disease after allogeneic hematopoietic stem cell transplant

## Authors

---

Ryotaro Nakamura,<sup>1\*</sup> Corinna La Rosa,<sup>1\*</sup> Dongyun Yang,<sup>2\*</sup> Joshua A. Hill,<sup>3</sup> Armin Rashidi,<sup>3,4</sup> Hannah Choe,<sup>5</sup> Qiao Zhou,<sup>1</sup> Chetan Raj Lingaraju,<sup>1</sup> Teodora Kaltcheva,<sup>1</sup> Jeffrey Longmate,<sup>2</sup> Jennifer Drake,<sup>6</sup> Cynthia Slape,<sup>7</sup> Lupe Duarte,<sup>1</sup> Monzr M. Al Malki,<sup>1</sup> Vinod A. Pullarkat,<sup>1</sup> Ahmed Aribi,<sup>1</sup> Steven Devine,<sup>5</sup> Michael R. Verneris,<sup>8</sup> Jeffrey S. Miller,<sup>4</sup> Stephen J. Forman,<sup>1</sup> Ibrahim Aldoss<sup>1</sup> and Don J. Diamond<sup>1</sup>

<sup>1</sup>Department of Hematology and Hematopoietic Cell Transplantation, City of Hope National Medical Center, Duarte, CA; <sup>2</sup>Department of Computational and Quantitative Medicine, City of Hope National Medical Center, Duarte, CA; <sup>3</sup>Fred Hutchinson Cancer Center, Seattle, WA; <sup>4</sup>Department of Medicine, Division of Hematology, Oncology, and Transplantation, University of Minnesota, Minneapolis, MN; <sup>5</sup>Division of Hematology, Department of Internal Medicine, The Ohio State University, Columbus, OH; <sup>6</sup>Department of Shared Resources-Clinical Trial Office, City of Hope National Medical Center, Duarte, CA; <sup>7</sup>Department of Clinical Research, City of Hope National Medical Center, Duarte, CA and <sup>8</sup>University of Colorado School of Medicine, Children's Hospital of Colorado, Aurora, CO, USA

*\*RN, CLR and DY contributed equally as first authors.*

Correspondence:

D.J. DIAMOND - [ddiamond@coh.org](mailto:ddiamond@coh.org)

<https://doi.org/10.3324/haematol.2023.284544>

A phase 2 randomized, placebo-controlled, multicenter trial to evaluate the efficacy of cytomegalovirus PepVax vaccine in preventing cytomegalovirus reactivation and disease after allogeneic hematopoietic stem cell transplant

\*Ryotaro Nakamura<sup>1</sup>, \*Corinna La Rosa<sup>1</sup>, \*Dongyun Yang<sup>2</sup>, Joshua A. Hill<sup>3</sup>, Armin Rashidi<sup>3,4</sup>, Hannah Choe<sup>5</sup>, Qiao Zhou<sup>1</sup>, Chetan Raj Lingaraju<sup>1</sup>, Teodora Kaltcheva<sup>1</sup>, Jeffrey Longmate<sup>2</sup>, Jennifer Drake<sup>6</sup>, Cynthia Slape<sup>7</sup>, Lupe Duarte<sup>1</sup>, Monzr M. Al Malki<sup>1</sup>, Vinod A. Pullarkat<sup>1</sup>, Ahmed Aribi<sup>1</sup>, Steven Devine<sup>5</sup>, Michael R. Verneris<sup>8</sup>, Jeffrey S. Miller<sup>4</sup>, Stephen J. Forman<sup>1</sup>, Ibrahim Aldoss<sup>1</sup> and Don J. Diamond<sup>1</sup>

\*RN, CLR and DY contributed equally as co-first authors.

<sup>1</sup>Department of Hematology and Hematopoietic Cell Transplantation and <sup>2</sup>Department of Computational and Quantitative Medicine, City of Hope National Medical Center, Duarte, CA, USA.

<sup>3</sup>Fred Hutchinson Cancer Center, Seattle, WA, USA.

<sup>4</sup>Department of Medicine, Division of Hematology, Oncology, and Transplantation, University of Minnesota, Minneapolis, MN, USA.

<sup>5</sup>Division of Hematology, Department of Internal Medicine, The Ohio State University, Columbus, OH, USA.

<sup>6</sup>Department of Shared Resources-Clinical Trial Office and <sup>7</sup>Department of Clinical Research, City of Hope National Medical Center, Duarte, CA, USA.

<sup>8</sup>University of Colorado School of Medicine, Children's Hospital of Colorado, Aurora, CO, USA.

**Corresponding author:** Don J. Diamond, [ddiamond@coh.org](mailto:ddiamond@coh.org)

## Supplementary data

### Supplementary Figure legends

**Figure 1S: Enrollment and randomization of HCT recipients.** The flow diagram shows the trial profile including enrollment, intervention allocation, follow-up, and data analysis. \*Denotes day of primary efficacy endpoint; HCT = hematopoietic stem cell transplant; COH = City of Hope; UMN = University of Minnesota; FHCC = Fred Hutchinson Cancer Center; OSUMC = The Ohio State University Wexner Medical Center; GVHD graft-versus-host disease; AE = adverse event.

**Figure 2S: Time-to-event curves for CMV events.** Kaplan–Meier estimates are shown, with censoring times indicated. The analysis was conducted by comparing cumulative incidence of CMV event rate by day 100 between PepVax and placebo arm, using Gray’s test for competing-risk events. **(A)** Bar indicates the cumulative incidence of CMV events at day 100 post-HCT (primary efficacy endpoint). **(B)** CMV events according to the treatment assignment, in the subgroup of HCT recipients who received a transplant from a CMV seropositive donor (left plot) and that one of HCT recipients who received a transplant from CMV seronegative donor (right plot).

**Figure 3S: Frequency of pp65<sub>495–503</sub>-specific CD8 T-cells by HCT donor CMV serostatus.** Longitudinal levels (T cells/ $\mu$ l) of pp65<sub>495–503</sub>-specific CD3<sup>+</sup> CD8<sup>+</sup> T-cells are shown by HCT donor CMV serostatus. Levels were computed using the loess scatterplot smoother providing the marginal geometric mean concentrations through time for each arm (as specified in the color legend). A 95% confidence band is shown in gray, and individual measurement trajectories are shown for each participant up to 7 days before the protocol-defined cytomegalovirus event. Logarithmic spacing of both scales is used to aid visualization. Distribution of pp65<sub>495–503</sub> specific CD8 T cells levels were approximately normal after log 10-transformation. Generalized estimating equations models were used to assess the vaccine effect on immunological responses All analyses were performed using SAS version 9.4 (SAS institute). The syringe symbol indicates post-HCT day of injections. D<sup>+</sup> = HCT CMV seropositive donor; D<sup>-</sup> = HCT CMV seronegative donor.

Figure 1S.

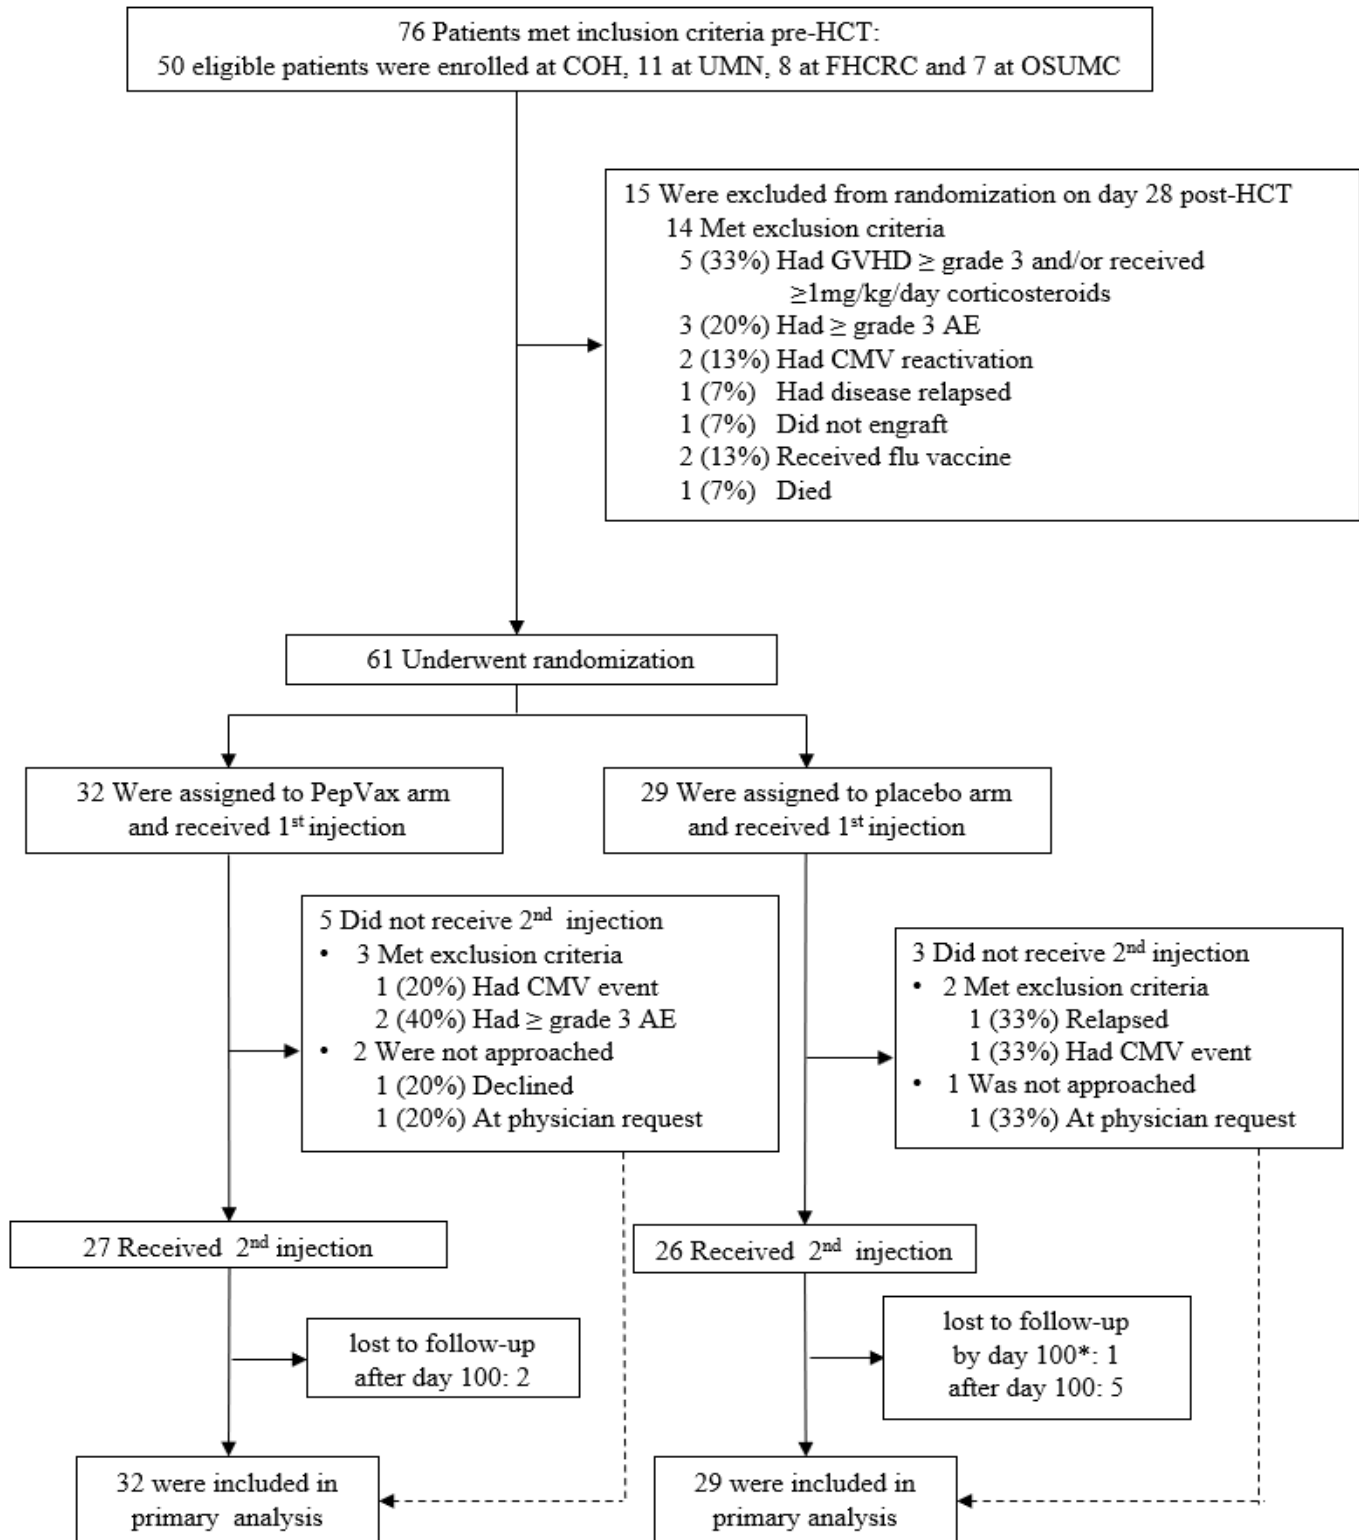

Figure 2S.

A

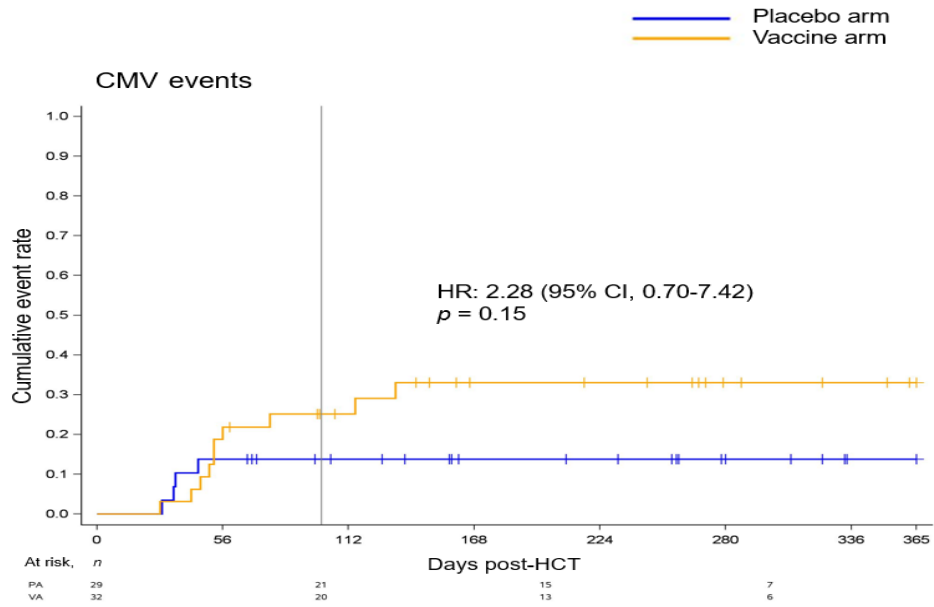

B

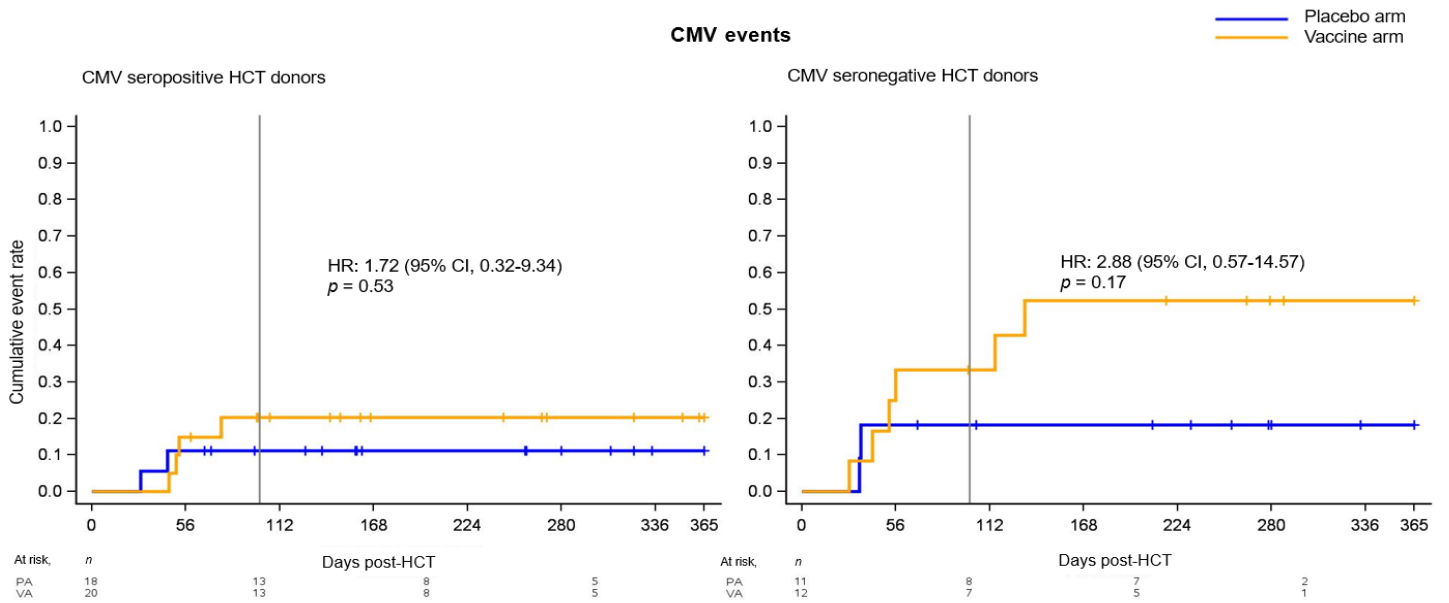

Figure 3S.

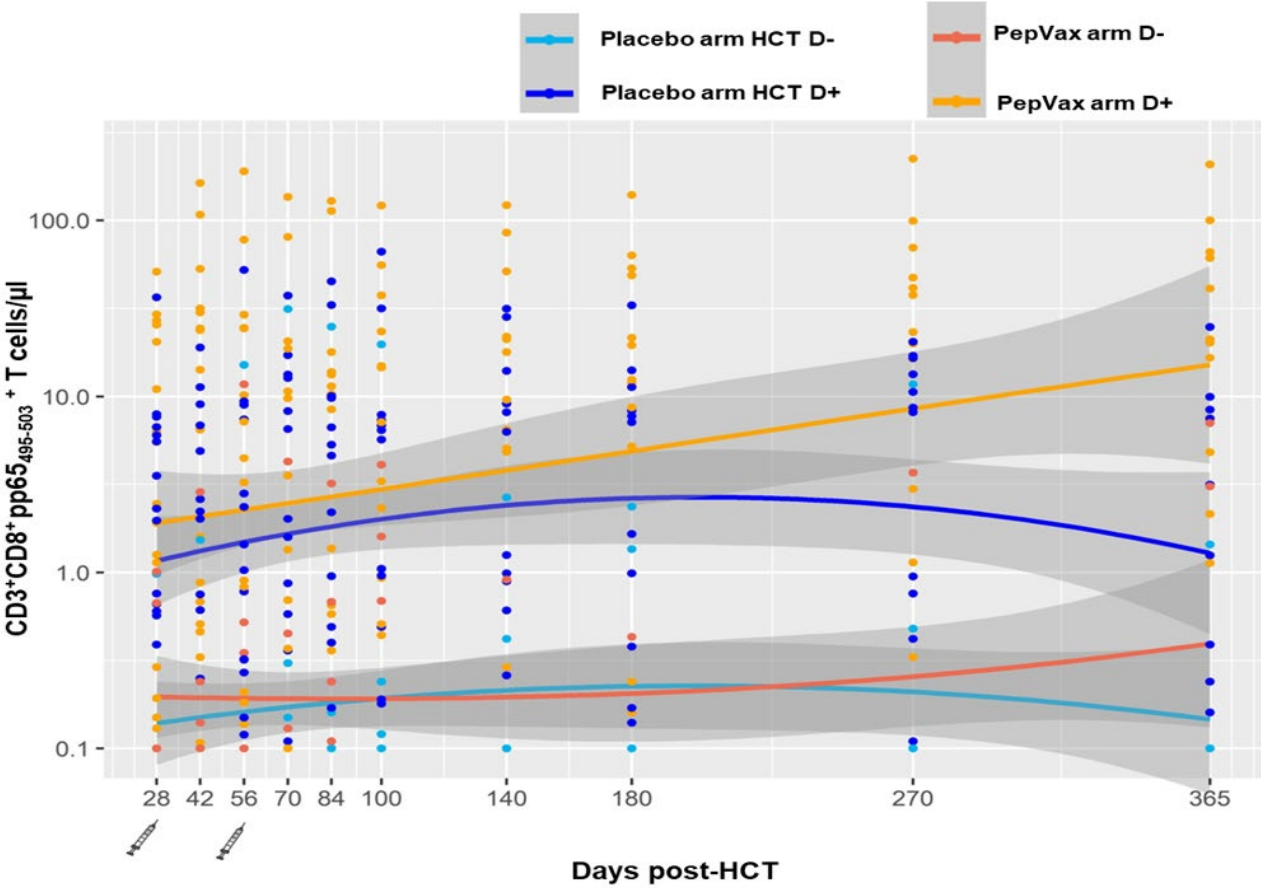

# Protocol experimental design schema

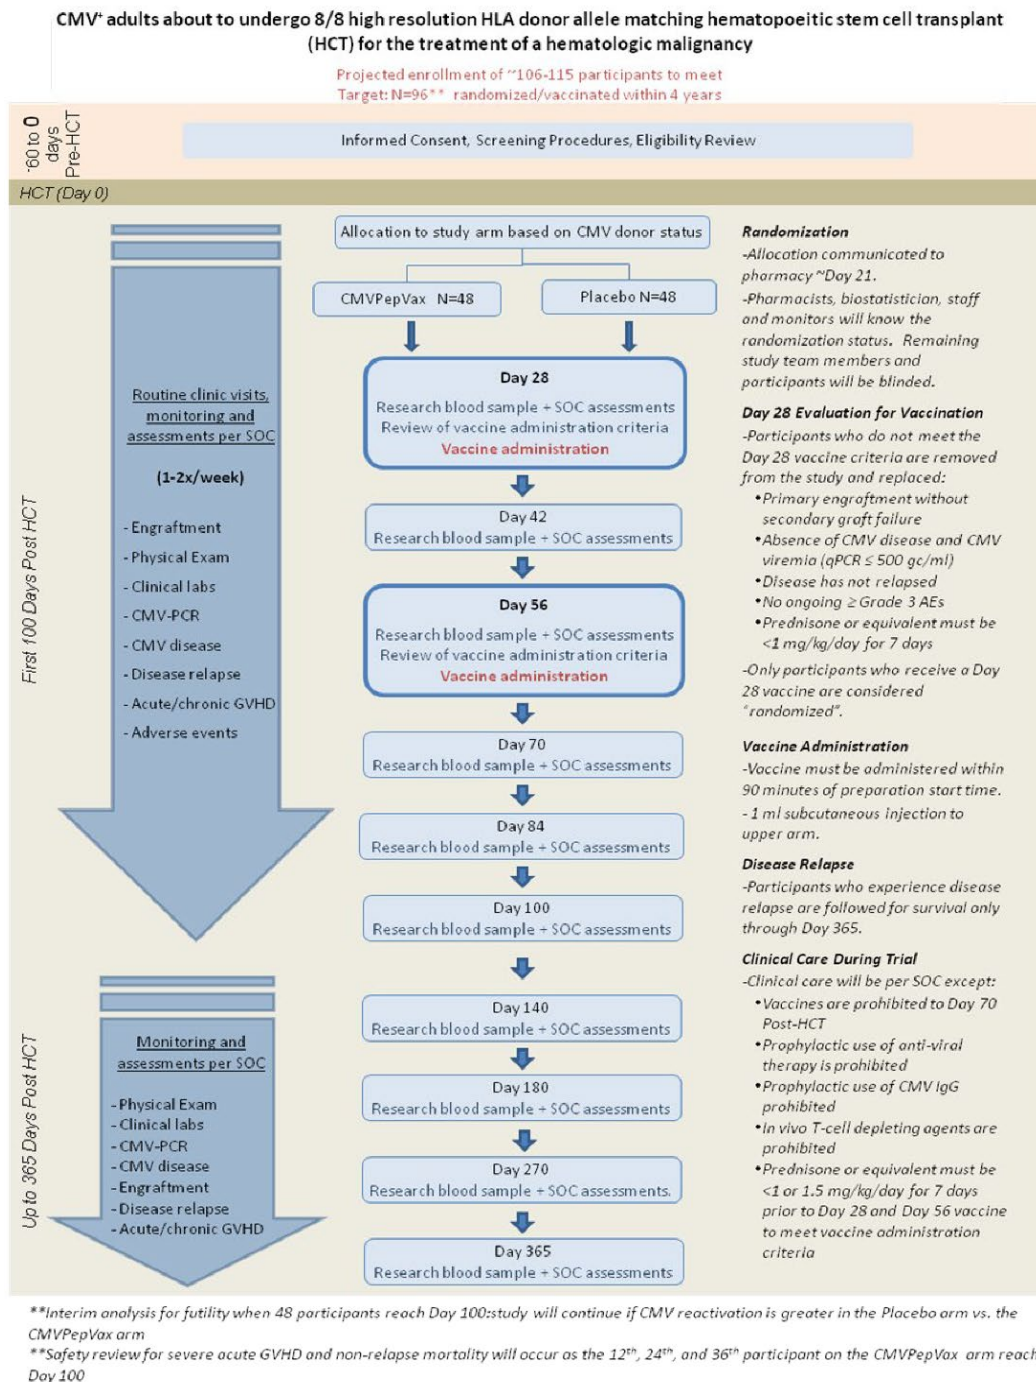

Supplement: 2023_284544_NAKAMURA_SUPPL.pdf [file 2023_284544_NAKAMURA_SUPPL.pdf]
